# Supplementary material
Source: MDPI journal article supplement (https://www.mdpi.com/2072-4292/9/1/71)
Supplement: s1 [file s1]

# Supplementary Materials: Monitoring Annual Urban Changes in a Rapidly Growing Portion of Northwest Arkansas with a 20-Year Landsat Record

Ryan Reynolds, Lu Liang, XueCao Li and John Dennis

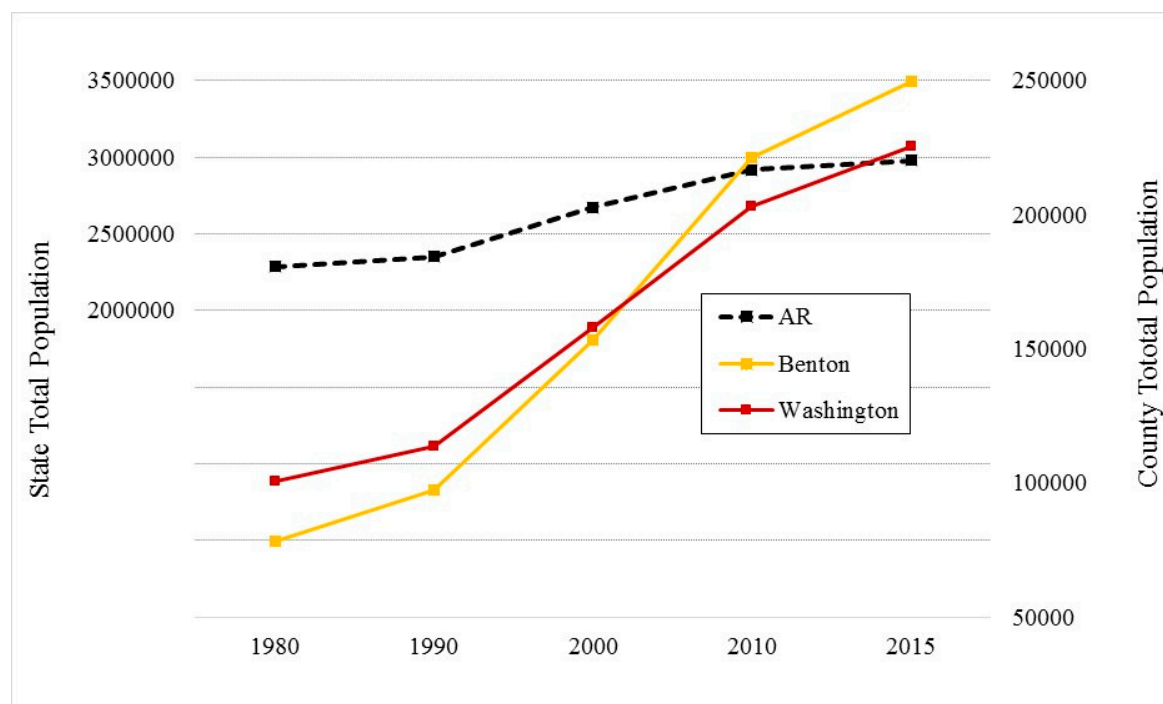

**Figure S1.** Total population changes from 1980 to 2015 in Arkansas State, Benton County and Washington County. Data was acquired from: Minnesota Population Center. National Historical Geographic Information System: Version 11.0 [Database]. Minneapolis: University of Minnesota. 2016. <http://doi.org/10.18128/D050.V11.0>.

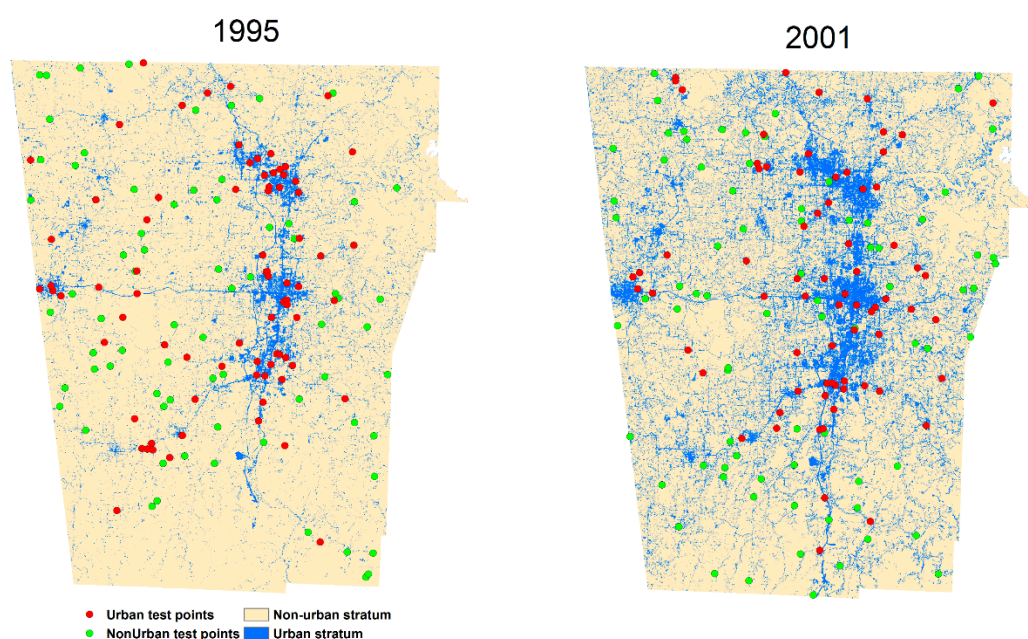

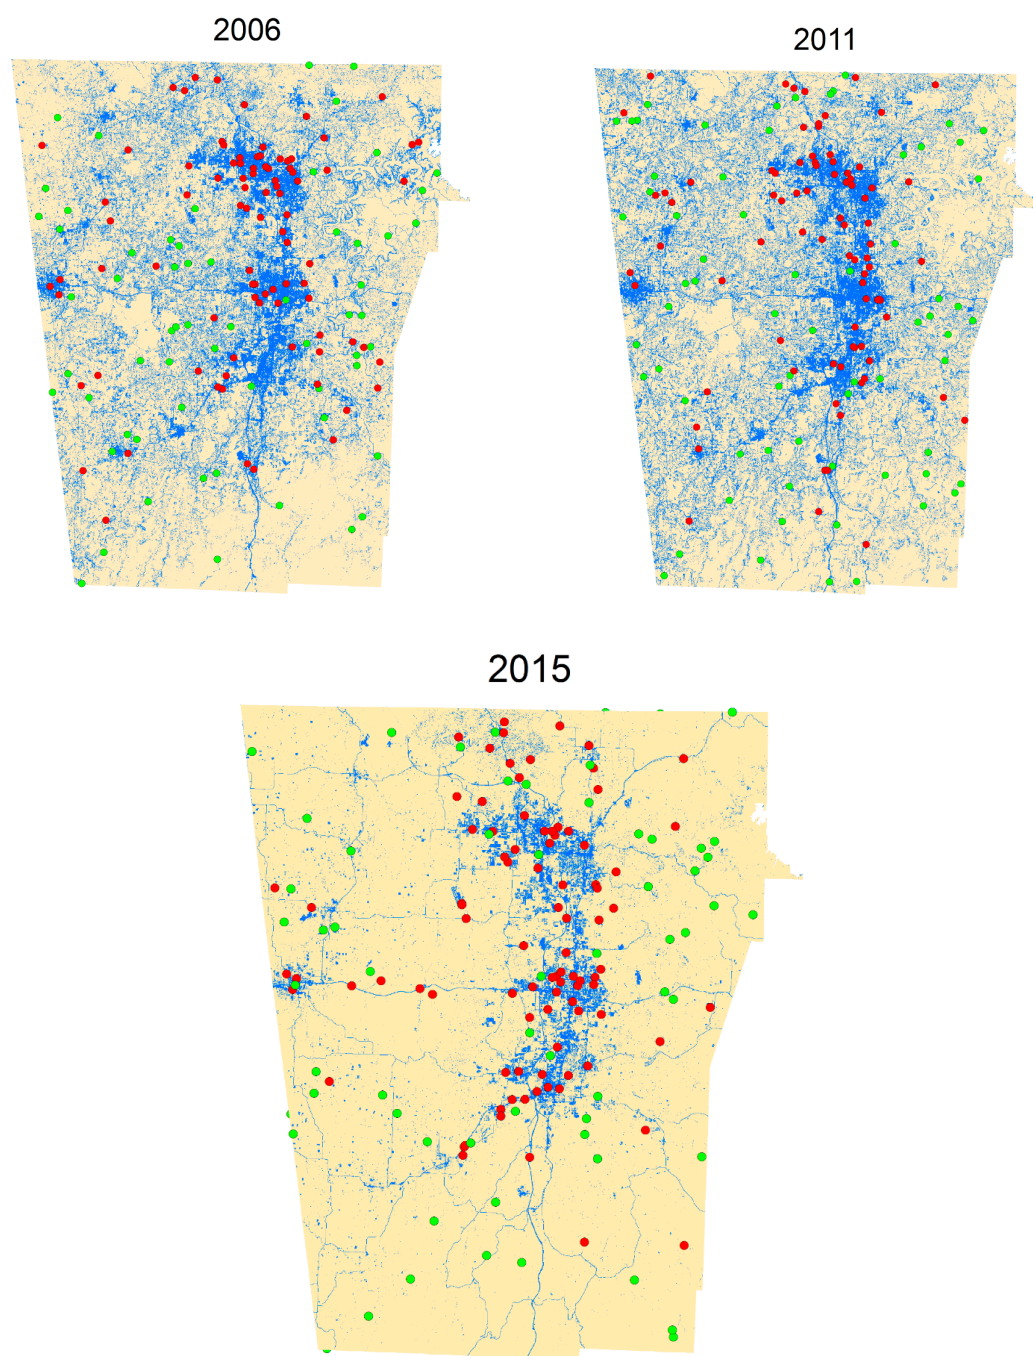

**Figure S2.** Validation point locations overlaid on sampling strata for test years.

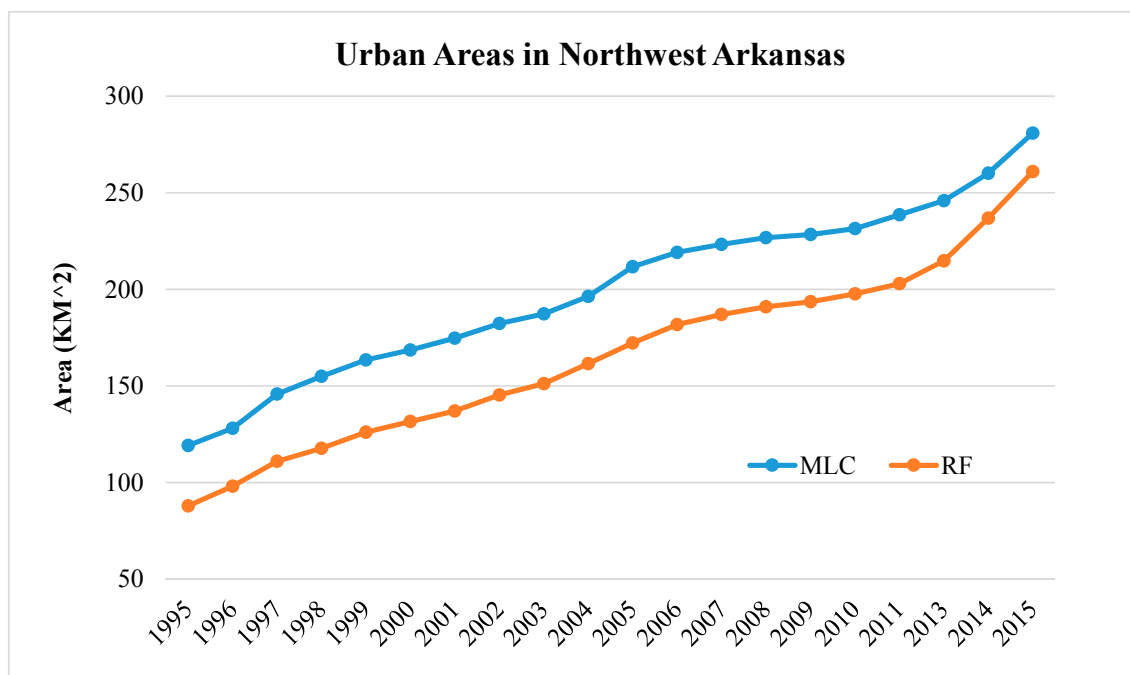

(a)

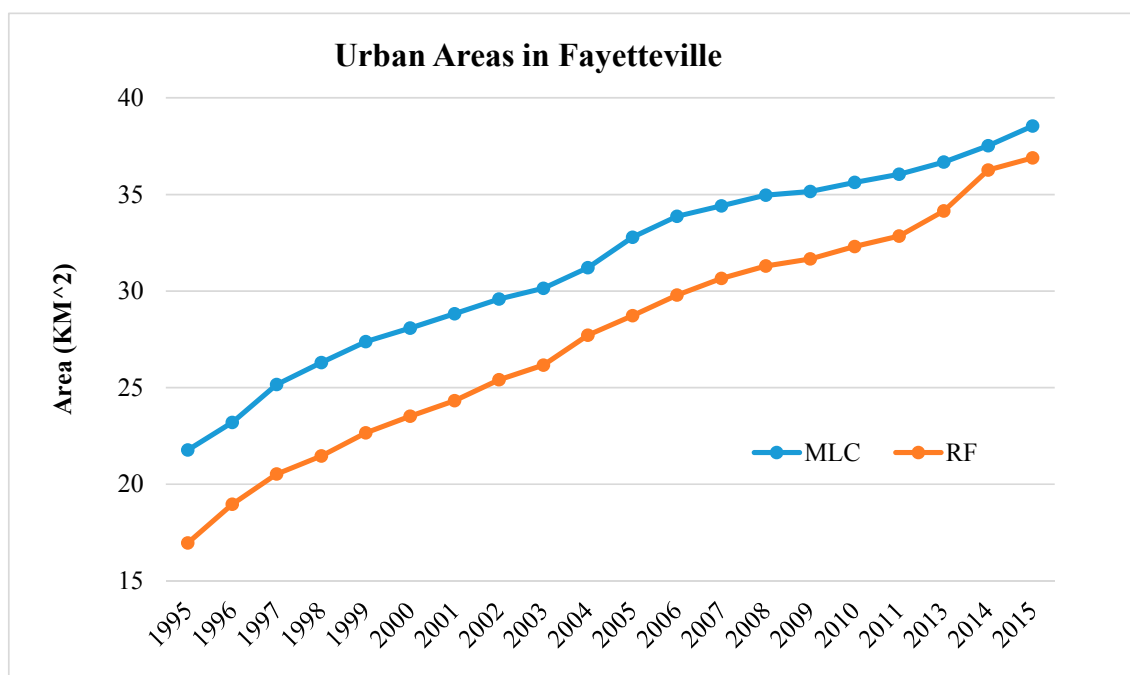

(b)

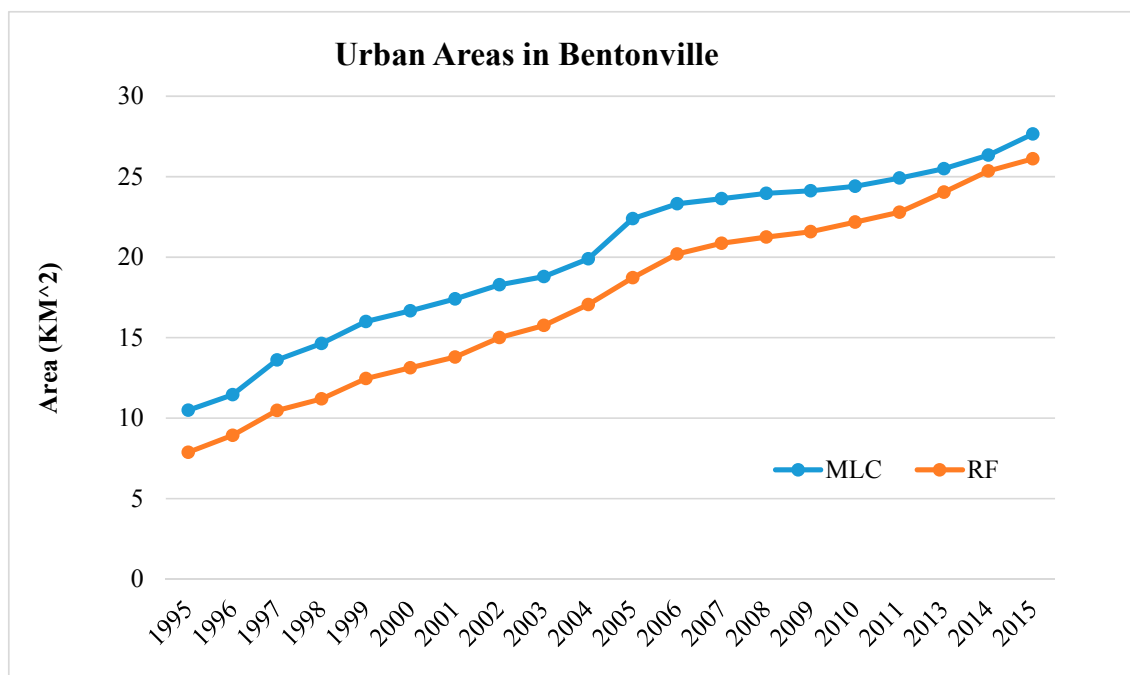

(c)

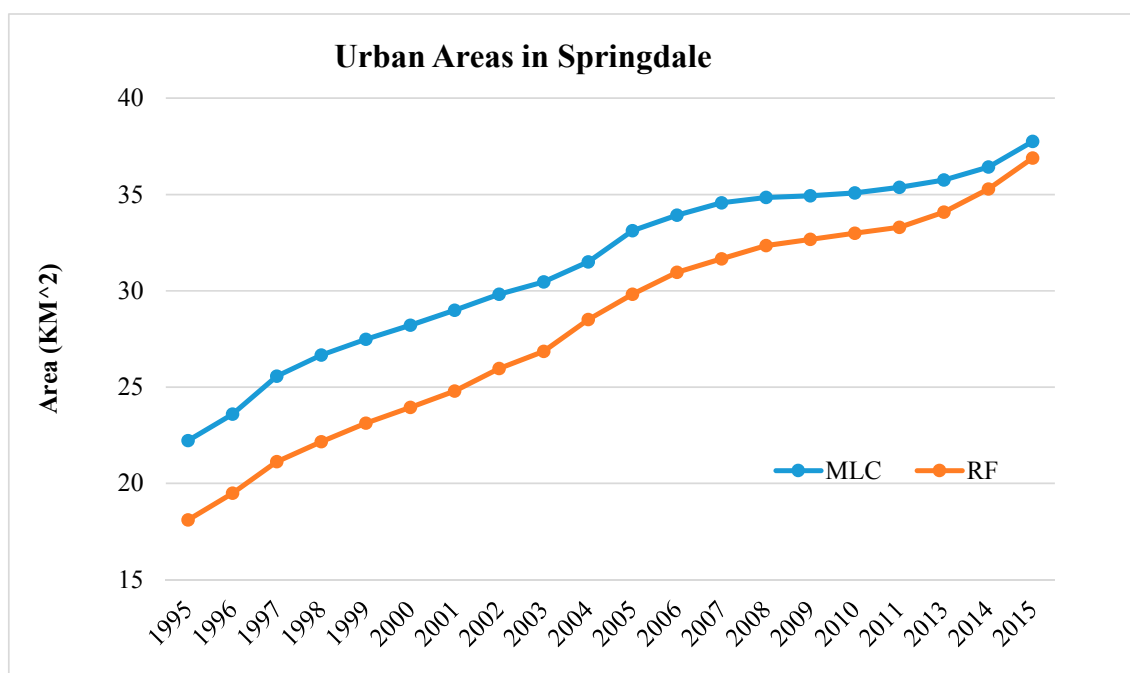

(d)

**Figure S3.** Urban area changes in Northwest Arkansas Area from 1995 to 2015. (a) The whole Northwest Arkansas Area; (b) Fayetteville city zone; (c) Bentonville city zone; (d) Springdale city zone.

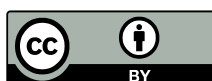

© 2016 by the authors; licensee MDPI, Basel, Switzerland. This article is an open access article distributed under the terms and conditions of the Creative Commons Attribution (CC-BY) license (<http://creativecommons.org/licenses/by/4.0/>).
