# Supplementary material
Source: MDPI journal article supplement (https://www.mdpi.com/2072-4292/9/1/71)
Supplement: s1 [file s1]

Archive with 2 entries (2 files):
- remotesensing-162864-Figure S1-S3-final.pdf
- remotesensing-162864-Table S1.xlsx
