# Supplementary material
Source: MDPI journal article supplement (https://www.mdpi.com/2072-4292/9/1/71)
Supplement: s1 [file s1 › remotesensing-162864-Table S1.xlsx]

## Sheet: MLC
	1995	TRUE				1995 after temporal filtering
Predicted	Urban	Not-Urban	Total	User's Accuracy (Errors of Comission)		Urban	Not-Urban	Total	User's Accuracy (Errors of Comission)
Urban	54	19	73	0.739726		44	0	44	1
Not-Urban	8	69	77	0.896104		18	88	106	0.830189
Total	62	88	150			62	88	150
Producers Accuracy (Errors of Omission)	0.870968	0.784091				0.709677	1
Overall Accuracy	0.82	Kappa	0.6383			0.88	Kappa	0.7415
	2001					2001 after temporal filtering
	Urban	Not-Urban	Total	User's Accuracy (Errors of Comission)		Urban	Not-Urban	Total	User's Accuracy (Errors of Comission)
Urban	45	32	77	0.584416		38	0	38	1
Not-Urban	2	71	73	0.972603		9	103	112	0.919643
Total	47	103	150			47	103	150
Producers Accuracy (Errors of Omission)	0.957447	0.68932				0.808511	1
Overall Accuracy	0.773333	Kappa	0.5511			0.94	Kappa	0.8529
	2006					2006 after temporal filtering
	Urban	Not-Urban	Total	User's Accuracy (Errors of Comission)		Urban	Not-Urban	Total	User's Accuracy (Errors of Comission)
Urban	61	21	82	0.743902		53	1	54	0.981481
Not-Urban	3	65	68	0.955882		11	85	96	0.885417
Total	64	86	150			64	86	150
Producers Accuracy (Errors of Omission)	0.953125	0.755814				0.828125	0.988372
Overall Accuracy	0.84	Kappa	0.6843			0.92	Kappa	0.8331
	2011					2011 after temporal filtering
	Urban	Not-Urban	Total	User's Accuracy (Errors of Comission)		Urban	Not-Urban	Total	User's Accuracy (Errors of Comission)
Urban	61	28	89	0.685393		55	1	56	0.982143
Not-Urban	1	60	61	0.983607		7	87	94	0.925532
Total	62	88	150			62	88	150
Producers Accuracy (Errors of Omission)	0.983871	0.681818				0.887097	0.988636
Overall Accuracy	0.806667	Kappa	0.6255			0.946667	Kappa	0.8884
	2015					2015 after temporal filtering
	Urban	Not-Urban	Total	User's Accuracy (Errors of Comission)		Urban	Not-Urban	Total	User's Accuracy (Errors of Comission)
Urban	80	10	90	0.888889		80	10	90	0.888889
Not-Urban	8	52	60	0.866667		8	52	60	0.866667
Total	88	62	150			88	62	150
Producers Accuracy (Errors of Omission)	0.909091	0.83871				0.909091	0.83871
Overall Accuracy	0.88	Kappa	0.7551			0.88	Kappa	0.7551

## Sheet: RF
	1995	TRUE				1995 after temporal filtering
Predicted	Urban	Not-Urban	Total	User's Accuracy (Errors of Comission)		Urban	Not-Urban	Total	User's Accuracy (Errors of Comission)
Urban	41	5	46	0.891304		17	0	17	1
Not-Urban	16	88	104	0.846154		11	122	133	0.917293
Total	57	93	150			28	122	150
Producers Accuracy (Errors of Omission)	0.719298	1				0.607143	1
Overall Accuracy	0.86	Kappa	0.65			0.926667	Kappa	0.6887
	2001					2001 after temporal filtering
	Urban	Not-Urban	Total	User's Accuracy (Errors of Comission)		Urban	Not-Urban	Total	User's Accuracy (Errors of Comission)
Urban	36	5	41	0.878049		35	0	35	1
Not-Urban	11	98	109	0.899083		12	103	115	0.895652
Total	47	103	150			47	103	150
Producers Accuracy (Errors of Omission)	0.765957	0.951456				0.744681	1
Overall Accuracy	0.893333	Kappa	0.7432			0.92	Kappa	0.8
	2006					2006 after temporal filtering
	Urban	Not-Urban	Total	User's Accuracy (Errors of Comission)		Urban	Not-Urban	Total	User's Accuracy (Errors of Comission)
Urban	60	15	75	0.8		49	1	50	0.98
Not-Urban	4	71	75	0.946667		15	85	100	0.85
Total	64	86	150			64	86	150
Producers Accuracy (Errors of Omission)	0.9375	0.825581				0.765625	0.988372
Overall Accuracy	0.873333	Kappa	0.746			0.893333	Kappa	0.7757
	2011					2011 after temporal filtering
	Urban	Not-Urban	Total	User's Accuracy (Errors of Comission)		Urban	Not-Urban	Total	User's Accuracy (Errors of Comission)
Urban	52	2	54	0.962963		51	0	51	1
Not-Urban	10	86	96	0.895833		11	88	99	0.888889
Total	62	88	150			62	88	150
Producers Accuracy (Errors of Omission)	0.83871	0.977273				0.822581	1
Overall Accuracy	0.92	Kappa	0.83			0.9267	Kappa	0.8447
	2015					2015 after temporal filtering
	Urban	Not-Urban	Total	User's Accuracy (Errors of Comission)		Urban	Not-Urban	Total	User's Accuracy (Errors of Comission)
Urban	77	6	83	0.927711		77	6	83	0.927711
Not-Urban	12	55	67	0.820896		12	55	67	0.820896
Total	89	61	150			89	61	150
Producers Accuracy (Errors of Omission)	0.865169	0.901639				0.865169	0.901639
Overall Accuracy	0.88	Kappa	0.7551			0.88	Kappa	0.7551
